# Supplementary material
Source: PubMed Central journal article supplement (PMC7643466)

## Segmentation in Mimics Innovation Suite

Training Set  
Creation

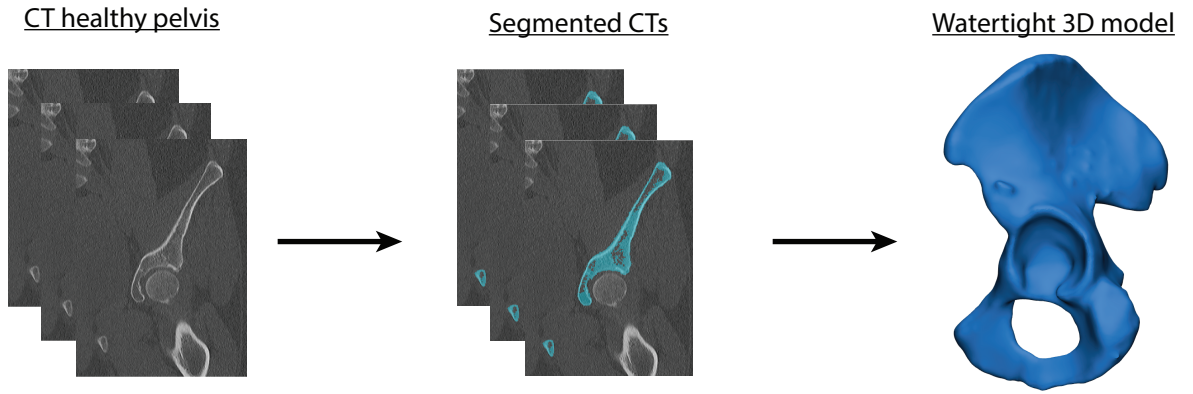

## Registration and Alignment using MeshMonk toolbox in MATLAB

Shape Model  
Creation

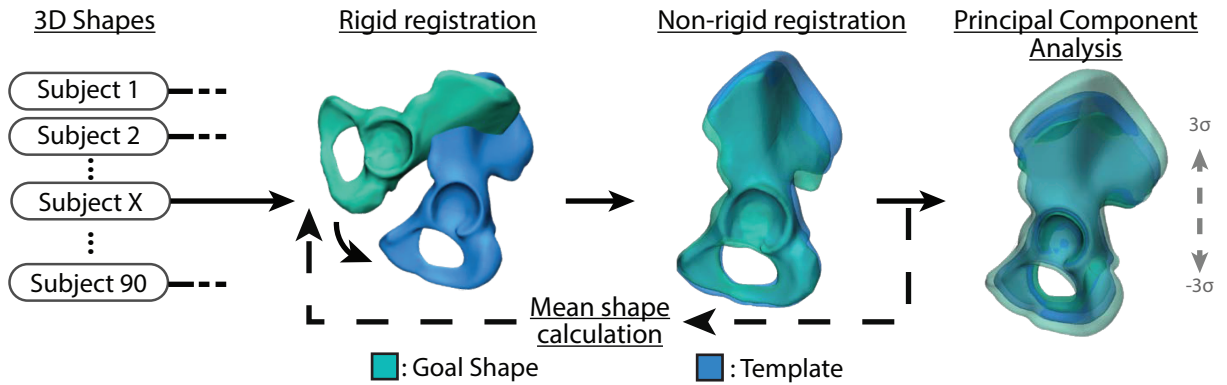

## Markov chain Monte Carlo-based reconstruction using Scalismo library in Scala

Shape  
reconstruction

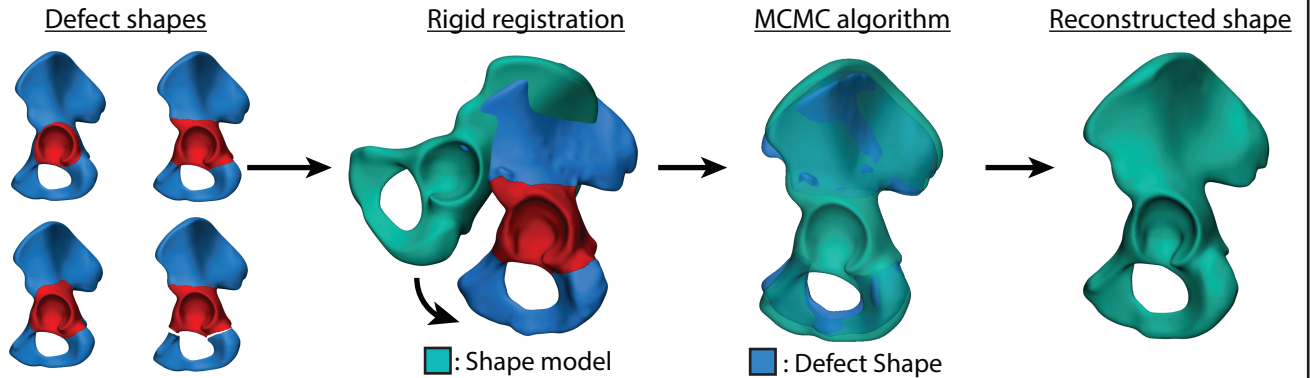

## Automated Measurements in MATLAB

Reconstruction  
Validation

Reconstruction and fit error

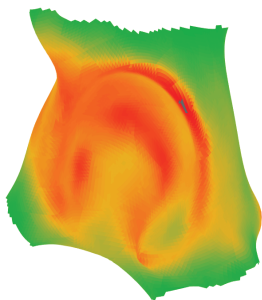

Hip joint centre position and acetabular radius

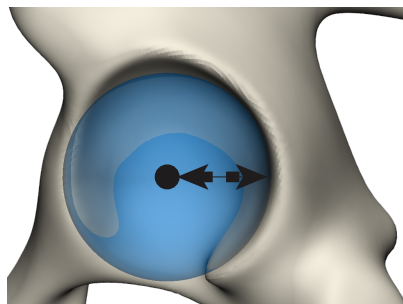

Acetabular direction

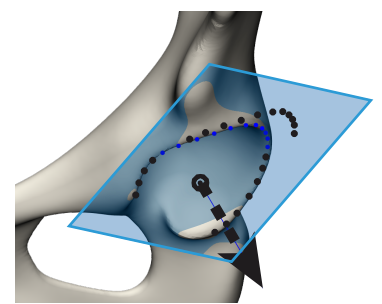

Supplement: NIHMS1641078-supplement-Supp_1.pdf [file NIHMS1641078-supplement-Supp_1.pdf]
